# Supplementary material for: Correlates of neutralizing/SARS-CoV-2-S1-binding antibody response with adverse effects and immune kinetics in BNT162b2-vaccinated individuals
Source: PubMed Central journal article supplement (PMC8613264; doi:10.1038/s41598-021-01930-y), 2021-11-24
Supplement: 41598_2021_1930_MOESM1_ESM.pdf [file 41598_2021_1930_MOESM1_ESM.pdf]

## **Supplementary Figures**

Supplement to: Maeda K, Amano M, Uemura Y et al. Correlates of Neutralizing/SARS-CoV-2-S1-binding Antibody Response with Adverse Effects and Immune Kinetics in BNT162b2-Vaccinated Individuals.

### **Contents**

Supplemental figures 1 to 4

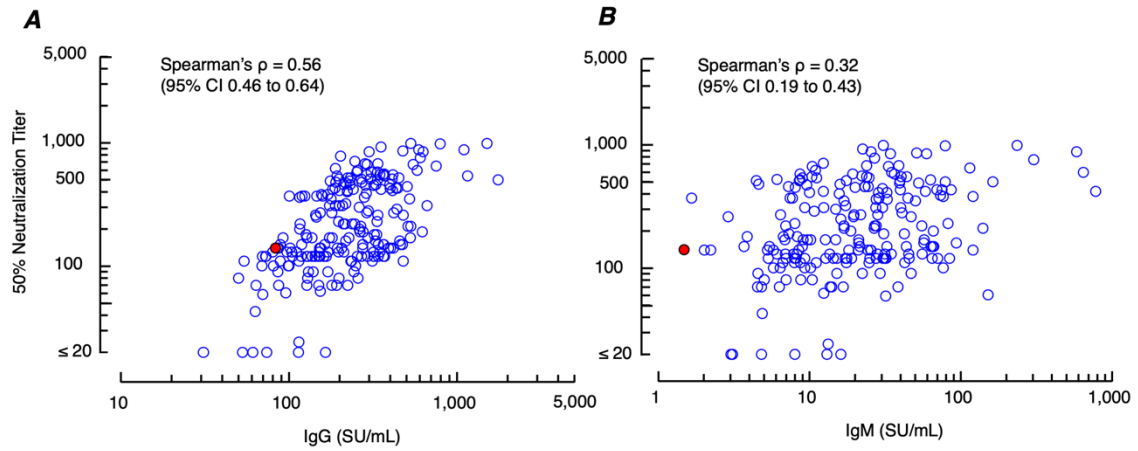

**Supplementary Figure 1.** A. Correlation between neutralizing activity and IgG levels on day 60 post 1<sup>st</sup> dose. Moderate correlation is identified (Spearman's  $\rho=0.56$ ,  $p<0.001$ ; 95% CI 0.46 to 0.64) between NT<sub>50</sub> values and S1-binding-IgG levels in samples obtained on day 60 post-1<sup>st</sup> dose. B. Correlation between neutralizing activity and S1-binding-IgM levels on day 60 post-1<sup>st</sup> dose. Low correlation is seen between neutralizing titers and S1-binding-IgM levels (Spearman's  $\rho=0.32$ ,  $p<0.001$ ; 95% CI 0.19 to 0.43). A red-solid circle denotes a person with previous SARS-CoV-2 infection documented.

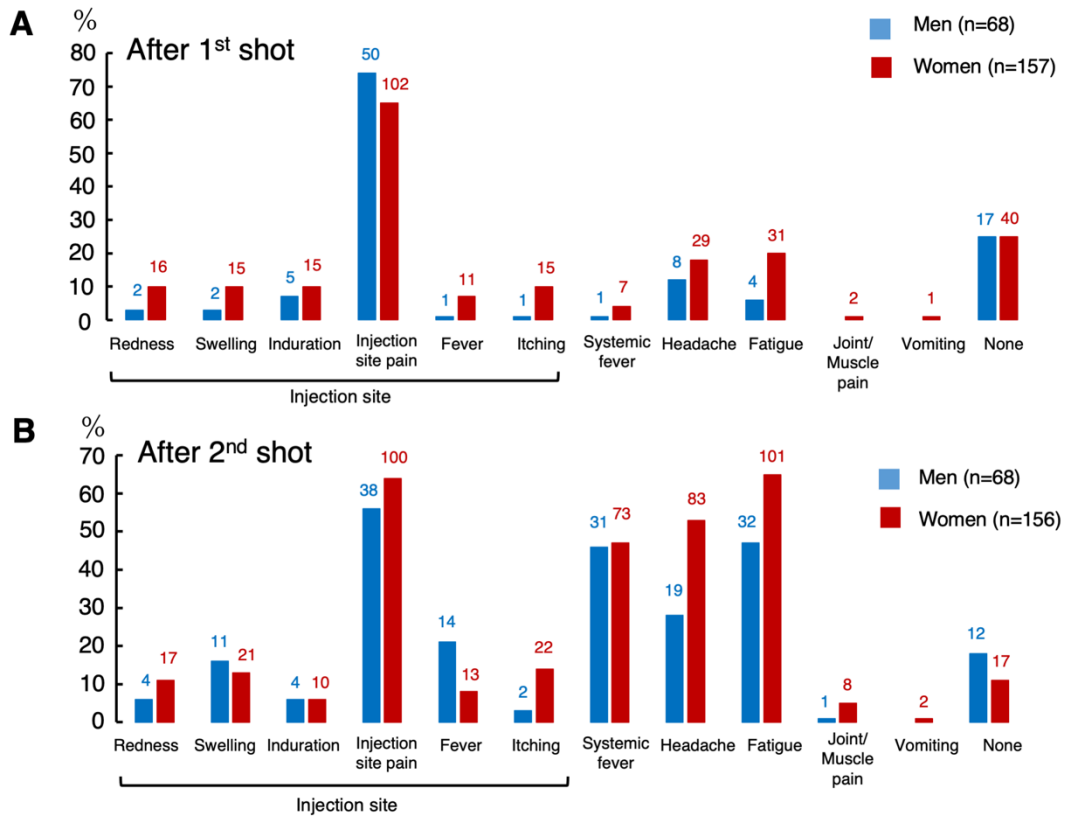

**Supplementary Figure 2.** Incidences of adverse effects reported after the 1<sup>st</sup> vaccination (A) and the 2<sup>nd</sup> vaccination (B). A total of 225 (Men: 68, Women: 157) participants reported after the 1<sup>st</sup> dose, and a total of 224 (Men: 68, Women: 156) participants after the 2<sup>nd</sup> dose. Systemic fever of  $\geq 37.1^{\circ}\text{C}$  and pain scores of  $\geq 1$  were taken into the analyses. The number at the top of each bar denotes the number of individuals reporting each AE.

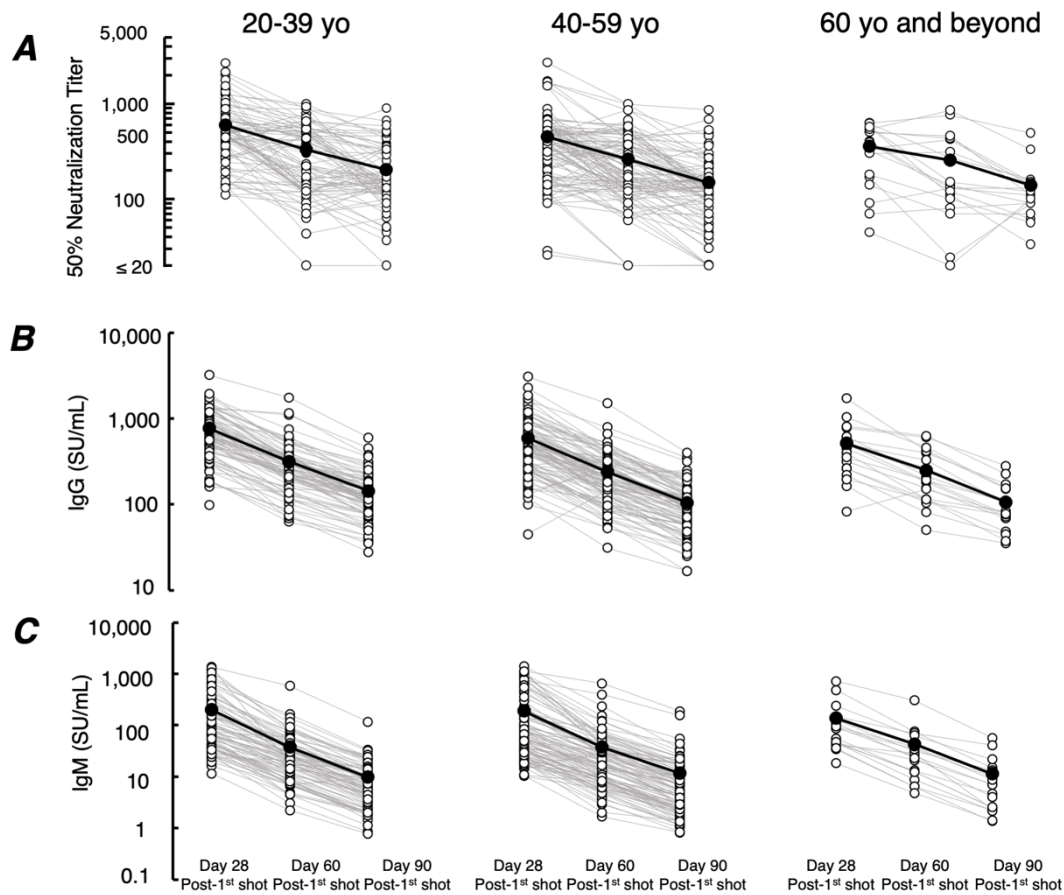

**Supplementary Figure 3.** Decline of neutralization titers and S1-binding antibody levels in three age groups. The chronological decline rates of neutralization titers (A), S1-binding-IgG (B), and -IgM levels (C) among three age groups; (i) 20-39 yo, (ii) 40-59 yo, and (iii) 60's and beyond, were evaluated. No significant difference was identified among the three age groups in the decline rates of neutralizing titers, IgG, or IgM levels ( $p=0.596$ ,  $0.163$ , and  $0.106$ , respectively). Statistical analysis was conducted with the mixed-effects model including time, age category and time-age category interaction term and intercept as a random effect. A solitary open circle on day 28 in the 20-39 yo subgroup illustrated in B denotes a participant who did not provide blood sample for unknown reason on days 60 and 90 post-1<sup>st</sup> dose.

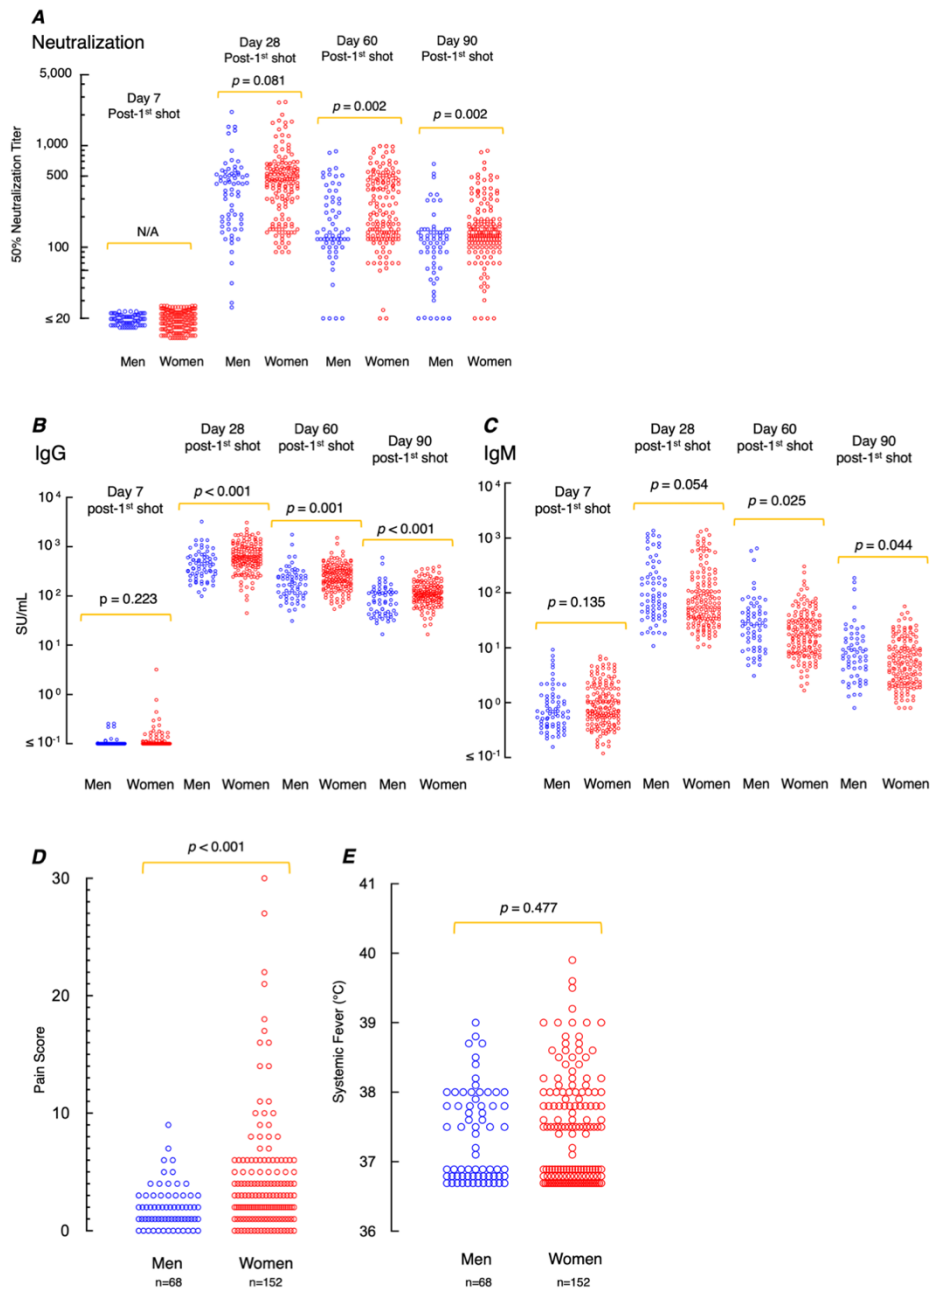

**Supplementary Figure 4.** Neutralization activity, S1-binding-IgG and -IgM levels, and pain scores are greater in women than in men. A. Neutralization activity was greater in women than in men at two timepoints (days 60 and 90 post-1<sup>st</sup> dose). B and C. S1-binding-IgG levels were greater in women at all three timepoints (days 28, 60, and 90 post-1<sup>st</sup> dose) and S1-binding-IgM levels greater in women at two timepoints (day 60 and 90 post-1<sup>st</sup> dose). D, E. Injection-site pain scores and systemic fever grades in men and women. Scores of injection-site pain were greater in women than in men ( $p < 0.001$ )(D), while no difference was seen in systemic fever grades between the two groups ( $p = 0.477$ )(E). Statistical significance was evaluated using Wilcoxon rank sum test. N.A., not applicable.
